# Supplementary material for: Nucleolin-targeted selenium nanocomposites with enhanced theranostic efficacy to antagonize glioblastoma
Source: Royal Society of Chemistry journal article supplement (doi:10.1039/c6tb03365b), 2017-01-01
Supplement: c6tb03365b1.pdf [file c6tb03365b1.pdf]

## Supporting Information

for

### Nucleolin-targeted Selenium Nanocomposites with Enhance Theranostic Efficacy to Antagonize Glioblastoma

Lizhen He,<sup>‡,a</sup> Lilan Zeng,<sup>‡,a</sup> Xiaoxuan Mai,<sup>a</sup> Changzheng Shi,<sup>b</sup> Liangping Luo,<sup>b</sup> Tianfeng Chen<sup>\*,a</sup>

#### Results:

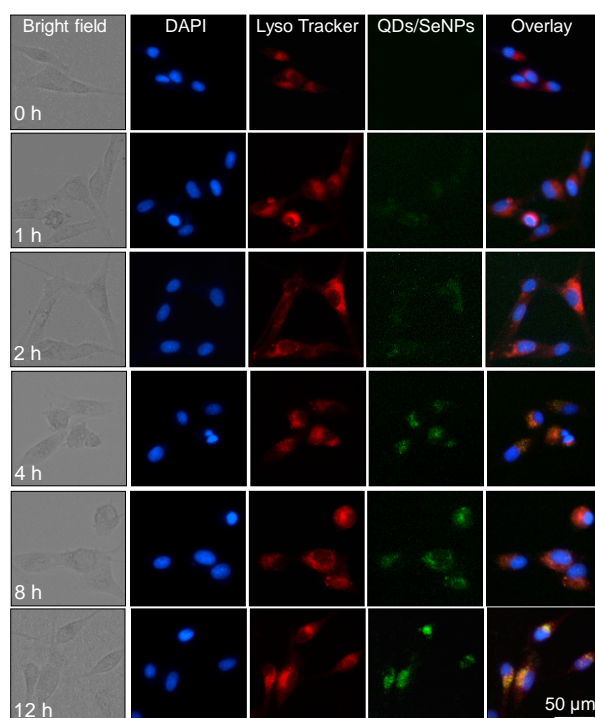

**Figure S1.** Intracellular trafficking of QDs/SeNPs (selenium nanoparticles just loaded with QDs) in U87 cells.

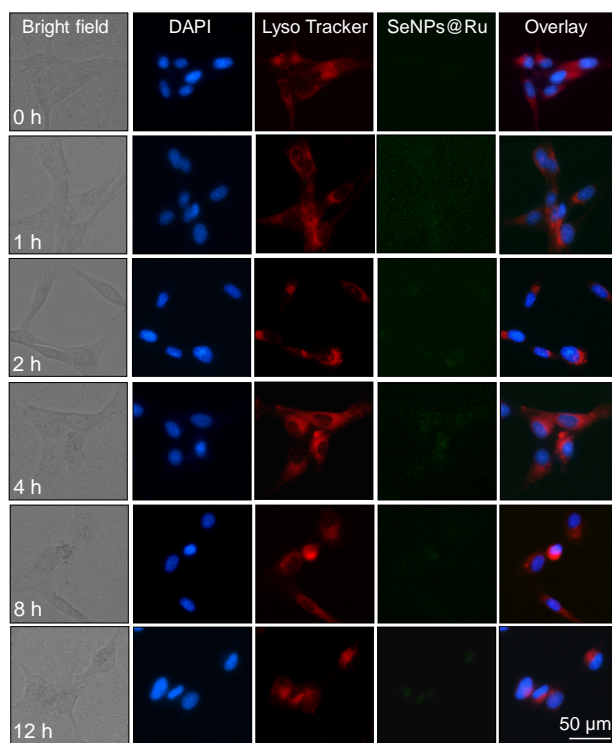

**Figure S2.** Intracellular trafficking of SeNPs@Ru (selenium nanoparticles just loaded with RuPFP) in U87 cells.
